# Supplementary material for: Colchicine Drug Interaction Errors and Misunderstandings: Recommendations for Improved Evidence-Based Management
Source: Springer Nature journal article supplement (doi:10.1007/s40264-022-01265-1), 2022-12-15
Supplement: MOESM1 [file 40264_2022_1265_MOESM1_ESM.pdf]

## Electronic Supplementary Material

### Journal: Drug Safety

#### **Article Title: Colchicine Drug Interaction Errors and Misunderstandings. Recommendations for Improved Evidence-Based Management**

Philip D. Hansten, PharmD,<sup>1</sup> Malinda S. Tan, PharmD,<sup>2</sup> John R. Horn, PharmD,<sup>1</sup> Ainhoa Gomez-Lumbreras, MD, PhD,<sup>2</sup>  
Lorenzo Villa Zapata, PharmD, PhD,<sup>3</sup> Richard D. Boyce, PhD,<sup>4</sup> Vignesh Subbian, PhD,<sup>5</sup> Andrew Romero, PharmD,<sup>6</sup>  
Sheila Gephart, PhD,<sup>7</sup> Daniel C. Malone, PhD<sup>2</sup>

1. School of Pharmacy, University of Washington, Seattle, Washington, USA
2. Department of Pharmacotherapy, College of Pharmacy, University of Utah, USA
3. College of Pharmacy, Mercer University, Atlanta, Georgia, USA
4. Department of Biomedical Informatics, School of Medicine, University of Pittsburgh, USA
5. College of Engineering, University of Arizona, USA
6. Department of Pharmacy, Tucson Medical Center, Tucson, AZ, USA
7. College of Nursing, University of Arizona, USA

**Corresponding author:** Philip D. Hansten, School of Pharmacy, University of Washington, Seattle, WA USA ORCID: 0000-0002-5835-7366

University email: [hansten@uw.edu](mailto:hansten@uw.edu) Home email: [phansten@gmail.com](mailto:phansten@gmail.com)

## Published Case Reports of Colchicine Drug Interactions

The following table present the details of the case reports describing colchicine drug-drug interactions. See footnotes (a through f) of first section of Table (Antiarrhythmics) for general explanations for all sections of the table.

### Antiarrhythmics – Amiodarone

| Patient [Ref] <sup>a</sup> | Colchicine Dose       | Amiodarone Dose             | Onset, <sup>b</sup><br>Presenting Symptoms                                                                                      | Laboratory and<br>Other Findings <sup>c</sup>                                                                       | Risk Factors <sup>d</sup>                                                                                        | Resolution <sup>e</sup>                                                                                               | DIPS<br>Rating <sup>f</sup> |
|----------------------------|-----------------------|-----------------------------|---------------------------------------------------------------------------------------------------------------------------------|---------------------------------------------------------------------------------------------------------------------|------------------------------------------------------------------------------------------------------------------|-----------------------------------------------------------------------------------------------------------------------|-----------------------------|
| 74 M [1]                   | 1 mg/day              | 200 mg/day                  | Colchicine stopped after first dose due to severe diarrhea, several days later: colonic perforation                             | GFR 34 mL/min, SCr increased from 2.4 to 5.2 before colon perforation                                               | Renal impairment; diclofenac and prednisone increased risk of colon perforation?                                 | Surgical repair of colon perforation                                                                                  | Doubtful <sup>g</sup>       |
| 65 F [2]                   | 1 mg/day              | 200 mg/day, 5 days per week | 2 weeks after starting colchicine for pericarditis she complained of myalgia and muscle weakness                                | CK 5780 IU/L, Aldolase 3700 IU/L, renal function and liver enzymes normal                                           | None noted.                                                                                                      | Colchicine stopped, and Sx improved rapidly; CK and aldolase decreased markedly; patient died from cardiac arrhythmia | Possible                    |
| 69 F [3]                   | 1.2 mg/day            | 1200 mg/day                 | After starting colchicine for pericarditis, nausea, vomiting, diarrhea, progressing to multiorgan failure and cardiogenic shock | Estimated CrCl 74 mL/min; serum colchicine still high 65 hours after last dose of colchicine (3.3 ng/mL)            | Mild reduction in renal function; colchicine continued for 10 days despite clear evidence of colchicine toxicity | After developing multiorgan failure and cardiogenic shock, she died of cardiac arrest                                 | Probable                    |
| 68 M [3]                   | 11.8 mg over 17 hours | 1200 mg/day                 | None mentioned                                                                                                                  | Estimated CrCl 53mL/min before colchicine; rapidly developed acute renal failure, thrombocytopenia, and hypotension | Markedly excessive colchicine dose for a patient with renal impairment <sup>h</sup>                              | Died of cardiac arrest                                                                                                | Possible                    |

- a. Abbreviations used in tables: ALT Alanine Aminotransferase; AST Aspartate Aminotransferase; CK Creatinine Kinase; CYC Cyclosporine; DCd Discontinued; Dx Diagnosis; ED Emergency department; EMG Electromyography; GFR Glomerular filtration rate; SCr Serum Creatinine; Sx Symptoms; F Female, LD Lactate Dehydrogenase; LFT Liver function tests; M Male; NS Not stated; Sx Symptoms; WBC White Blood Cell Count
- b. Onset of symptoms after second drug started (colchicine or interacting drug).
- c. Laboratory results represent peak values during the adverse drug interaction.
- d. Included here are disease states likely to increase the risk of colchicine toxicity, such as renal impairment or liver disease. Also included are other drugs that may have contributed to the reaction, and excessive doses of colchicine.
- e. Resolution of adverse effects, including the measures taken to combat the reaction, and the patient outcome.
- f. DIPS Rating: Drug Interaction Probability Scale (DIPS) as described in Horn, J.R., Hansten, P.D., Chan, L-N. Proposal for a New Tool to Evaluate Drug Interaction Cases. *Ann. Pharmacother.* **41**, 674-680 (2007).
- g. The authors proposed that colchicine concentrations were elevated due to severe renal impairment and amiodarone, causing severe diarrhea leading to perforation of the colon which was more susceptible to perforation due to the prednisone and diclofenac therapy. Nonetheless, it is not known 1) whether the colonic perforation was caused by the diarrhea, or 2) whether the severe diarrhea would have occurred without the amiodarone therapy (given the renal failure which would have elevated the colchicine concentrations by itself).
- h. The high colchicine dose given the renal impairment was probably the main cause of the colchicine toxicity, but the amiodarone likely contributed.

## Azole Antifungals - Fluconazole

| Patient [Ref] | Colchicine Dose | Fluconazole Dose    | Onset, Presenting Symptoms                                                                                                     | Laboratory and Other Findings                                                                                               | Risk Factors                                          | Resolution                                                                                               | DIPS Rating |
|---------------|-----------------|---------------------|--------------------------------------------------------------------------------------------------------------------------------|-----------------------------------------------------------------------------------------------------------------------------|-------------------------------------------------------|----------------------------------------------------------------------------------------------------------|-------------|
| 54 F [4]      | 1.2 mg/day      | 100 mg/day x 7 days | 2 days after finishing the 7-day course of fluconazole she went to ED with marked lower limb weakness and bilateral ankle pain | CK 803 IU/L, SCr 11.2 mg/dL, Potassium 6.2 mmol/L, ALT 112 U/L, WBC 2830 cells/mL; EMG: consistent with colchicine myopathy | Severe renal impairment (SCr 11.2 mg/dL) <sup>a</sup> | Colchicine stopped; 10 days later her laboratory results returned to normal; weakness gradually improved | Probable    |

a. The fluconazole dose was only 100 mg/day, a dose that would be expected to have minimal effects on colchicine pharmacokinetics. But fluconazole is largely eliminated unchanged in the urine, and this patient's serum creatinine was 11.2 mg/dL. Her fluconazole serum concentrations, therefore, were probably much higher than they would be in a person with normal renal function. [Berl, T. et al. Pharmacokinetics of fluconazole in renal failure. *J. Am. Soc. Nephrol.* 6, 242-247 (1995).]

## Calcineurin Inhibitors: Cyclosporine (CYC)

| Patient, [Ref]       | Colchicine Dose | Cyclosporine Dose                                             | Onset, Presenting Symptoms                                                                                          | Laboratory and Other Findings                                                                                    | Risk Factors                                                                        | Resolution                                                                                                         | DIPS Rating           |
|----------------------|-----------------|---------------------------------------------------------------|---------------------------------------------------------------------------------------------------------------------|------------------------------------------------------------------------------------------------------------------|-------------------------------------------------------------------------------------|--------------------------------------------------------------------------------------------------------------------|-----------------------|
| 57 F [5]             | 2 mg/d x 4 days | 440 mg/day                                                    | 12 days after colchicine started: myalgia, muscle weakness with full functional disability                          | CK 2344 U/L, LD 622 U/L, SCr 1.6 mg/dL                                                                           | CYC dose increased. 320 to 440 mg/d 14 days before colchicine; renal transplant     | CYC decreased to 280 mg/d; Sx and lab abnormalities resolved in 7 d                                                | Possible              |
| 44 M [6]             | 1.2 mg/day      | 5mg/kg/day                                                    | ~ 30 days after start of cyclosporine severe muscle weakness requiring intubation                                   | CK 600 U/L, LFTs elevated (AST, ALT, bilirubin); EMG and muscle biopsy consistent with colchicine myopathy       | Had CYC-induced nephrotoxicity; renal transplant; on clotrimazole (inhibits CYP3A4) | Improved over 1-2 months; still required a crutch to walk                                                          | Possible              |
| 55 M [7]             | 1.2 mg/day      | 100 mg/day                                                    | 2 weeks after starting colchicine: diarrhea, GI distress, progressive muscle weakness                               | CK 2339 U/L, AST 393 U/L, ALT 233 U/L, LD 643 U/L; EMG: toxic myopathy                                           | Chronic corticoids; renal transplant, renal impairment                              | Colchicine stopped, CK decreased, marked Sx improvement over 3 weeks                                               | Probable              |
| 57 M [8]             | 1.2 mg/day      | 175 mg/day                                                    | 8 weeks after starting colchicine he was admitted for progressive muscle weakness                                   | CK normal; SCr stable at 2.1 mg/dL; Muscle biopsy: colchicine myopathy                                           | Chronic corticoids; renal transplant                                                | Colchicine stopped; within 2 weeks muscle strength improved                                                        | Probable              |
| Four M age 26-41 [9] | 1.0-2.0 mg/day  | Started with dose of 3.0 mg/kg/day (all had low serum levels) | In "early stages" all 4 had diarrhea and other GI symptoms; one was hospitalized due to muscle weakness and myalgia | All 4 had increased LD; 3 had increased ALT and bilirubin; 2 had substantial increases in SCr                    | Chronic corticoids; renal transplant                                                | CYC stopped during third week; all 4 patients had rapid resolution of symptoms and lab values returned to baseline | Possible <sup>a</sup> |
| 48 M [10]            | 1 mg/d x 7 days | NS                                                            | 7 days after starting colchicine: diarrhea, paralysis, rhabdomyolysis                                               | CK 31,110 U/L, LD 8,330 U/L, SCr 2.8 mg/dL, WBC 1500/mm <sup>3</sup>                                             | Chronic corticoids, renal transplant                                                | Sx resolved over 1 month; required cane to walk                                                                    | Probable              |
| 48 F [11]            | 0.6 mg/day      | NS                                                            | 3 months after starting colchicine: progressive muscle weakness leading to inability to walk                        | CK 254 U/L, SCr 2.8 mg/dL, CYC 515 ng/dL (ref. 100-250 ng/dL); Muscle biopsy: colchicine myopathy; EMG: myotonia | Chronic corticoids, renal transplant, renal impairment, excessive CYC levels        | Colchicine stopped, dose of CYC reduced, improved over 10 weeks, still needed cane to walk                         | Probable              |

| Patient, [Ref] | Colchicine Dose      | Cyclosporine Dose | Onset, Presenting Symptoms                                                                                | Laboratory and Other Findings                                                                                                        | Risk Factors                                                                           | Resolution                                                                              | DIPS Rating           |
|----------------|----------------------|-------------------|-----------------------------------------------------------------------------------------------------------|--------------------------------------------------------------------------------------------------------------------------------------|----------------------------------------------------------------------------------------|-----------------------------------------------------------------------------------------|-----------------------|
| 48 M [11]      | 0.6 mg/day           | NS                | 9 months after starting colchicine muscle weakness                                                        | CK 2100 U/L, SCr 3.3 mg/dL, CYC levels therapeutic                                                                                   | Chronic corticoids, renal transplant, renal impairment, excessive CYC levels           | Colchicine stopped, weakness improved within weeks                                      | Possible <sup>a</sup> |
| 41 M [11]      | 0.6 mg/day           | NS                | About 16 months after starting colchicine muscle weakness                                                 | CK 319 U/L, CYC levels therapeutic, on hemodialysis                                                                                  | Chronic corticoids, renal transplant, renal impairment                                 | Colchicine stopped, weakness improved within weeks                                      | Possible <sup>a</sup> |
| 70 M [12]      | 1.2 mg/day x 7 years | NS                | 2 months after CYC started, bedridden from extreme myalgia; also fatigue, anorexia, muscle weakness       | CK 434 U/L, SCr 2 mg/dL; Muscle biopsy: colchicine myopathy                                                                          | Chronic corticoids, renal transplant, renal impairment                                 | Colchicine stopped, myalgia and weakness improved over 10 days; minimal pain at 1 month | Probable              |
| 39 F [13]      | 0.6 mg/day           | NS                | 14 days after starting colchicine severe muscle weakness; colchicine started 1 week after renal allograft | CK not measured; EMG not measured; no muscle biopsy done; AST increased after colchicine started, decreased after colchicine stopped | CYC and corticoid dose increased before myopathy; chronic corticoids; renal transplant | CYC stopped; weakness better at 2 weeks, resolved by 4 weeks                            | Possible              |
| 70 M [14]      | 1 mg/day             | NS                | 16 months after colchicine started developed muscle weakness                                              | CK 425 U/L, SCr 2.2 mg/dL; EMG: myogenic syndrome; Muscle biopsy: colchicine myopathy                                                | Reduced renal function; on chronic corticoids; renal transplant                        | Improved after colchicine stopped; time course NS                                       | Possible <sup>a</sup> |
| 55 M [14]      | 1 mg/day             | NS                | 2 months after colchicine started developed myalgia                                                       | CK 1840 U/L, SCr 1.7 mg/dL                                                                                                           | Reduced renal function; on chronic corticoids; renal transplant                        | Improved after colchicine stopped; time course NS                                       | Possible <sup>a</sup> |
| 49 F [14]      | 1 mg/day             | NS                | 26 months after colchicine started she developed myalgia                                                  | EMG: myogenic syndrome; Muscle biopsy: colchicine myopathy; CK 1234 U/L, SCr 1.8 mg/dL                                               | Reduced renal function; on chronic corticoids; renal transplant                        | Improved after colchicine stopped; time course NS                                       | Possible <sup>a</sup> |
| 56 M [14]      | 1 mg/day             | NS                | 11 months after colchicine started he developed myalgia                                                   | CK 251 U/L, SCr 1.4 mg/dL; EMG: axonal neuropathy                                                                                    | Reduced renal function; chronic corticoids; renal transplant                           | Improved after colchicine stopped; time course NS                                       | Possible <sup>a</sup> |
| 67 M [14]      | 1 mg/day             | NS                | 10 months after colchicine started he developed myalgia and muscle weakness                               | CK 1135 U/L, SCr 1.4 mg/dL; EMG: severe myopathy                                                                                     | Reduced renal function; on chronic corticoids; renal transplant                        | Improved after colchicine stopped; time course NS                                       | Possible <sup>a</sup> |
| 49 M [15]      | 2.4 mg/day x 3 days  | 250 mg/day        | 4 days after colchicine started he developed myalgia, muscle weakness                                     | EMG: myopathy; CK 14,958 U/L, Creatinine 2.7 mg/dL, CYC levels high normal                                                           | Large dose of colchicine; renal transplant; mild renal impairment                      | Improved over a few weeks after colchicine stopped                                      | Probable              |
| 53 M [16]      | 0.6 mg/day           | 350 mg/day        | Onset NS; First myalgia, fatigue, malaise, followed by severe muscle weakness                             | CK > 3,000 U/L, Creatinine 2.9 mg/dL; serum CYC elevated; EMG: myopathy; Muscle biopsy: colchicine myopathy                          | Chronic corticoids; renal impairment; elevated serum CYC                               | Colchicine and CYC stopped; muscle weakness improved within 1 week                      | Probable              |
| 56 M [16]      | 0.6 mg/day           | 450 mg/day        | 6 weeks after starting cyclosporine: muscle weakness, fatigue, malaise                                    | CK 449 U/L, Creatinine 1.9 mg/dL; Serum CYC elevated; EMG: myopathy; Muscle biopsy: colchicine myopathy                              | Chronic corticoids; renal impairment; elevated serum CYC                               | Colchicine stopped; muscle weakness resolved over a few weeks                           | Probable              |
| 57 F [16]      | 0.6 mg/day           | 120 mg/day        | 5 days after starting CYC she developed severe muscle weakness, paresthesias                              | CK 721 U/L, Creatinine 2.2 mg/dL; EMG: myopathy                                                                                      | Cardiac transplant 5 days earlier; renal failure; chronic corticoids                   | CYC stopped; weakness improved over 1 month                                             | Possible              |

| Patient, [Ref]    | Colchicine Dose                                             | Cyclosporine Dose | Onset, Presenting Symptoms                                                                                                                                              | Laboratory and Other Findings                                                                                                                                                     | Risk Factors                                                                                                                                            | Resolution                                                                                                                                | DIPS Rating |
|-------------------|-------------------------------------------------------------|-------------------|-------------------------------------------------------------------------------------------------------------------------------------------------------------------------|-----------------------------------------------------------------------------------------------------------------------------------------------------------------------------------|---------------------------------------------------------------------------------------------------------------------------------------------------------|-------------------------------------------------------------------------------------------------------------------------------------------|-------------|
| 53 M [17]         | 1.5 mg/day                                                  | 250 mg/day        | Gradual onset of myalgia, muscle weakness, then severe weakness, diarrhea                                                                                               | CK 3003 U/L, Creatinine 3.4 mg/dL; EMG: normal; Muscle biopsy: necrotizing myopathy                                                                                               | Chronic corticoids; renal impairment                                                                                                                    | Colchicine stopped; Sx gone in several days                                                                                               | Probable    |
| 60 M [18]         | 1 mg/day                                                    | 200 mg/day        | Patient with Behçet disease on colchicine for 10 years and CYC for 6 years: muscle weakness progressed over 4 weeks; required wheelchair                                | CK 626 U/L, SCr 1.4 mg/dL, serum CYC in normal range; Muscle biopsy: colchicine myopathy (vacuoles)                                                                               | Renal impairment                                                                                                                                        | CYC stopped, colchicine dose reduced to 1 mg/day; 3 weeks later his muscle strength was normal and he could walk                          | Possible    |
| 72 M [19]         | 1 mg/day                                                    | NS                | On chronic CYC; ~ 1 month after colchicine dose increased to 1 mg/d: severe muscle weakness, myalgia, lethargy                                                          | CK 766 U/L, Creatinine 1.2 mg/dL; EMG: severe myopathy                                                                                                                            | Chronic corticoids; renal transplant                                                                                                                    | Colchicine stopped; he was pain-free, able to walk by 3 weeks                                                                             | Probable    |
| 47 F [20]         | 1.2 mg/day                                                  | 200 mg/day        | After many months of combined therapy, admitted with weakness, myalgia, fatigue of 7 days duration                                                                      | CK normal, SCr 1.8 mg/dL, small elevation of liver enzymes (AST, ALT, LD), cyclosporine 451 ng/mL; EMG: myopathy; Muscle biopsy: vacuolar myopathy (colchicine)                   | Chronic corticoids; renal transplant; cyclosporine levels slightly elevated                                                                             | Cyclosporine stopped for 5 days, then restarted at 100 mg/day but Sx worsened; Colchicine stopped, Sx disappeared, lab results normalized | Possible    |
| 62 Gender NS [21] | 2 mg/day x 3 days; 1 mg/day QOD x 5 days; then 1 mg/day     | 125 mg/d          | 3 days after colchicine started diarrhea, followed by nausea, abdominal pain, myalgia, severe muscle weakness, fatigue, insomnia, confusion, adynamic ileus, arrhythmia | CK 2671 U/L, Creatinine 2.27 mg/dL, CrCl 23 mL/min, pancytopenia                                                                                                                  | On diltiazem (known to increase colchicine AUC); renal impairment                                                                                       | Colchicine stopped; gradual improvement over 2 to 3 weeks                                                                                 | Possible    |
| 47 M [22]         | 1 mg/day                                                    | 200 mg/d          | 2 months after starting colchicine admitted with progressive muscle weakness becoming severe                                                                            | CK 25,237 U/L, AST 225 U/L, SCr 6.2 mg/dL                                                                                                                                         | On atorvastatin 20 mg/day (myopathy risk and some inhibition of P-gp); chronic corticoids; renal transplant                                             | Atorvastatin stopped no improvement; then COL stopped and CK declined, normal in 3 weeks                                                  | Probable    |
| 60 M [23]         | 1 mg/day x 6 days                                           | 175 mg/d          | 3 days after starting colchicine, diarrhea, vomiting, myalgia, weakness, fever, dyspnea, supraventricular tachycardia, rhabdomyolysis, neutropenia                      | CK 1553 U/L, myoglobin 5188 ng/mL, Creatinine 7.9 mg/dL; elevated serum colchicine persisted days after stopping colchicine <sup>b</sup>                                          | Severe renal impairment; On amiodarone (inhibits CYP3A4 and P-gp), but only after reaction had started                                                  | Colchicine stopped and Sx improved within 2-3 days; myalgia persisted, but he improved gradually over several weeks                       | Probable    |
| 66 M [24]         | 1.2 mg/day                                                  | 150 mg/d          | 4 months after colchicine: muscle weakness and myalgia; after admission: dyspnea, rhabdomyolysis, oliguria                                                              | CK 33,580 U/L; Muscle biopsy: colchicine myopathy                                                                                                                                 | Simvastatin dose doubled when colchicine started; simvastatin + CYC can cause myopathy; on other myotoxic drugs: corticoids, and propofol <sup>c</sup>  | Died 5 days after admission from pneumonia and septic shock                                                                               | Possible    |
| 34 M [25]         | 3 mg/day x 1 day; 2 mg/day x 2 days; then 1 mg/day x 6 days | 340 mg/day        | 12 days after starting colchicine admitted to ICU with cough, dyspnea, hemoptysis, profuse diarrhea, rhabdomyolysis                                                     | CK 3206 U/L, Creatinine 2.4 mg/dL, Myoglobin 573 µg/L (ref. 28-72 µg/L); serum COL more than 4 x the reference range; still elevated almost a week after COL stopped <sup>d</sup> | Large dose of COL; on azithromycin (↑ colchicine AUC); on pravastatin (can cause myopathy); CYC ↑ pravastatin AUC; renal impairment, chronic corticoids | Colchicine stopped; 11 days later improvement in muscular and respiratory Sx; renal function stabilized                                   | Possible    |

| Patient, [Ref] | Colchicine Dose       | Cyclosporine Dose | Onset, Presenting Symptoms                                                                                                                                                                                | Laboratory and Other Findings                                                                                                                   | Risk Factors                                                                                                             | Resolution                                                                                                                         | DIPS Rating           |
|----------------|-----------------------|-------------------|-----------------------------------------------------------------------------------------------------------------------------------------------------------------------------------------------------------|-------------------------------------------------------------------------------------------------------------------------------------------------|--------------------------------------------------------------------------------------------------------------------------|------------------------------------------------------------------------------------------------------------------------------------|-----------------------|
| 59 M [26]      | 3 mg/day              | NS                | 5 days after starting colchicine developed abdominal pain, mucous diarrhea, myalgia; day 7 developed quadriparesis, alopecia on day 29                                                                    | CK 12,116 U/L, Hemoglobin 8.2 g/dL, Creatinine 5.8 mg/dL; LFTs elevated, Serum colchicine still therapeutic 11 days after DCd                   | Large dose of colchicine; on atorvastatin (myopathy risk and some inhibition of P-gp); renal failure, chronic corticoids | Colchicine & atorvastatin DCd; CYC switched to tacrolimus; Recovered gradually over 3 months                                       | Probable              |
| 57 F [27]      | 0.6 mg/day            | 100 mg/day        | After starting colchicine: Day 5: abdominal pain, nausea, vomiting; Day 7: tingling and numbness in hands and feet; Day 21: to ED with worsening renal function, elevated CK, liver enzymes and myoglobin | CK: 2316 U/L, LD: 973 U/L, AST 227 U/L, Myoglobin 2151 ng/mL, SCr 1.97 mg/dL, ANC $1.0 \times 10^3/\mu\text{L}$ ; CYC levels: therapeutic range | On rosuvastatin 20 mg/day; chronic corticoids; renal transplant                                                          | Colchicine, rosuvastatin stopped on day 21; GI Sx improved in 2 days; normalization of CK, LD, AST, SCr, ANC occurred over 3 weeks | Probable              |
| 58 F [28]      | 7.8 mg over 3 days    | NS                | 1 day after starting colchicine, severe diarrhea; 3 days after starting colchicine progressive weakness, hypotension; to ED with probable sepsis, alopecia                                                | Pancytopenia, neutrophils had vacuoles (indicating COL toxicity), CYC concentration low                                                         | Excessive colchicine dose; renal impairment; chronic corticoids; renal transplant                                        | Died 7 days after admission from pancytopenia and multiorgan failure                                                               | Possible <sup>e</sup> |
| 46 M [29]      | 0.5 mg/day x 6 months | NS                | Presented with nausea, lethargy, generalized aches, and 6 months of diarrhea; Exam showed muscle weakness                                                                                                 | CK 523 U/L, SCr 2.9 mg/dL, cyclosporine trough level high normal; EMG: severe myopathy                                                          | Chronic corticoids; renal transplant                                                                                     | Rx: IV fluids, corticoids; CYC dose adjusted; incr. weakness until colchicine DCd 3 weeks later                                    | Possible              |

a. Inadequate information provided on concurrent medications for detailed assessment of causality.

b. Serum colchicine after stopping colchicine: 36 hours = 7 ng/mL, 50 hours = 6.5 ng/mL, 74 hours = 5 ng/mL (reference 1 to 4 ng/mL).

c. Propofol may inhibit CYP3A4 [Hamoka, N et al. Clin Pharmacol Ther. 66, 110-7 1999], and may also increase the risk of rhabdomyolysis [Hemphill S et al. Br. J. Anaesth. 122, 448-59 (2019)]

d. Serum colchicine 24h after last dose = 13 ng/mL; after 153 hours = 2.7 ng/mL (reference range: 0.3-2.5 ng/mL).

e. Cyclosporine serum concentration 25 ng/mL (ref. 250-1000 ng/mL) so contribution of cyclosporine not clear.

### Calcineurin Inhibitors: Tacrolimus

| Patient, Ref. | Colchicine Dose | Tacrolimus Dose | Onset, Presenting Symptoms                                      | Laboratory and Other Findings                   | Risk Factors                                                            | Resolution                                                                | DIPS Rating |
|---------------|-----------------|-----------------|-----------------------------------------------------------------|-------------------------------------------------|-------------------------------------------------------------------------|---------------------------------------------------------------------------|-------------|
| 62 M [30]     | 1.2 mg/day      |                 | A few days after starting colchicine: myalgia, malaise, fatigue | CK 9084 U/L, SCr 1.2 mg/dL, AST 4-fold increase | On nifedipine and vardenafil, both of which might modestly inhibit P-gp | Colchicine DCd, and CK declined to 5204 U/L in 3 days, AST normal in 2 mo | Probable    |

### Calcium Channel Blockers - Verapamil

| Patient, Ref. | Colchicine Dose                       | Verapamil Dose | Onset, Presenting Symptoms                                                                            | Laboratory and Other Findings                                                                                                                                                                                           | Risk Factors                                                                                                                                 | Resolution                                                | DIPS Rating |
|---------------|---------------------------------------|----------------|-------------------------------------------------------------------------------------------------------|-------------------------------------------------------------------------------------------------------------------------------------------------------------------------------------------------------------------------|----------------------------------------------------------------------------------------------------------------------------------------------|-----------------------------------------------------------|-------------|
| 83 M [31]     | 1 mg/day x 2 days (drops, self-dosed) | 120 mg/day     | Muscle weakness during 2 day course of colchicine; 4 days later hospitalized for flaccid tetraparesis | CK 1288 U/L, normal renal/hepatic function; EMG: lower motor neuron lesion; Muscle biopsy: one vacuole; excessive colchicine concentrations in serum and cerebrospinal fluid; colchicine half-life 272 hrs <sup>a</sup> | None observed. Given normal renal/hepatic function, and high serum colchicine, it is possible he took more colchicine drops than he reported | Follow-up about a month later found only partial recovery | Probable    |

a. The half-life was 8 times longer than expected in dose and age matched controls. The authors propose that the elevated cerebrospinal fluid colchicine concentrations were caused by P-gp inhibition by verapamil at the blood-brain barrier.

## Enzyme Inducers

| Patient, Ref.              | Colchicine Dose                      | Enzyme Inducer Dose             | Onset, Presenting Symptoms                                                                   | Laboratory and Other Findings                                                                                   | Risk Factors                           | Resolution                                                       | DIPS Rating |
|----------------------------|--------------------------------------|---------------------------------|----------------------------------------------------------------------------------------------|-----------------------------------------------------------------------------------------------------------------|----------------------------------------|------------------------------------------------------------------|-------------|
| <b>Carbamazepine (CBZ)</b> |                                      |                                 |                                                                                              |                                                                                                                 |                                        |                                                                  |             |
| 61 M [32]                  | 1.2 mg/day x 6 days                  | Chronic CBZ Dose N.S.           | Patient with hemorrhagic pericarditis failed to improve after 6 days of colchicine           | Serum colchicine subtherapeutic (0.94 ng/mL) after 6 days of colchicine 1.2 mg/day                              | None reported                          | Carbamazepine and colchicine DCd; no more colchicine levels done | Probable    |
| <b>Rifampin</b>            |                                      |                                 |                                                                                              |                                                                                                                 |                                        |                                                                  |             |
| 54 M [33]                  | 1.8 mg/day x 9 days, then 3.6 mg/day | Rifampin chronic use; Dose N.S. | Acute gout did not respond to 1.8 mg/day x 9 days; pain relief after increased to 3.6 mg/day | Serum colchicine 1 and 6 hours after 0.6 mg colchicine 1.4 ng/mL and 0.2 ng/mL (much lower than other patients) | Chronic kidney disease (SCr 7.6 mg/dL) | No described.                                                    | Probable    |

## Grapefruit

| Patient, Ref. | Colchicine Dose        | Grapefruit Dose                           | Onset, Presenting Symptoms                                                                                                                                                                                                                               | Laboratory and Other Findings                                                                                             | Risk Factors                                               | Resolution                                                                                                                                                    | DIPS Rating           |
|---------------|------------------------|-------------------------------------------|----------------------------------------------------------------------------------------------------------------------------------------------------------------------------------------------------------------------------------------------------------|---------------------------------------------------------------------------------------------------------------------------|------------------------------------------------------------|---------------------------------------------------------------------------------------------------------------------------------------------------------------|-----------------------|
| 8 W [34]      | 2 mg/day for 10 months | 1 liter grapefruit juice/day for 2 months | After 2 months of daily grapefruit juice in large amounts, she was admitted with fever, severe abdominal pain, recurrent vomiting, sore throat; then CHF, arrhythmias, circulatory shock, pancytopenia; later developed atonia/weakness leading to falls | WBC 420 cells/mm <sup>3</sup> , Platelets 27,000 /mm <sup>3</sup> , SCr 1.1 mg/dL, elevated AST and ALT, Sodium 127 mEq/L | Large dose of colchicine, large amount of grapefruit juice | Admitted pediatric ICU, assisted ventilation, fresh frozen plasma, platelets and packed cells infusions, antibiotics; reversed completely after about 2 weeks | Possible <sup>a</sup> |

a. The severe colchicine toxicity observed in this 8-year-old girl is not necessarily inconsistent with the negative results in a study of healthy subjects [Wason S, DiGiacinto JL, Davis MW. Effects of grapefruit and Seville oranges on the pharmacokinetic properties of colchicine in healthy subjects. *Clin. Ther.* **34**, 2161-73 (2012).] Perhaps ingestion of normal amounts of grapefruit juice has little effect on colchicine pharmacokinetics, but large amounts (such as 1 liter/day in an 8-year-old) have a greater effect on CYP3A4, and also a significant inhibitory effect on P-gp as well. The magnitude of pharmacokinetic drug interactions is usually dose-related, and the fact that grapefruit juice produces a small increase in digoxin serum concentration suggests that grapefruit may have some inhibitory effect on P-gp. Also, some people have lower P-gp activity due to genomic differences, and such people tend to have higher bioavailability to drugs that are substrates for P-gp such as digoxin. [Kurata, Y et al. Role of human *MDR1* gene polymorphism in bioavailability and interaction of digoxin, a substrate of P-glycoprotein. *Clin Pharmacol. Ther.* **72**, 209-19 (2002)] Accordingly, even if normal amounts of grapefruit juice have little effect on P-gp in most people, if a patient with genetically low P-gp activity ingests grapefruit juice, they would, in effect, have low activity of both CYP3A4 and P-gp. This would predispose them to grapefruit-induced elevations of colchicine serum concentrations.

## HMG-CoA Reductase Inhibitors (Statins)

| Patient, Ref.       | Colchicine Dose | Statin Dose            | Onset, Presenting Symptoms                                                               | Laboratory and Other Findings                                                      | Risk Factors                                              | Resolution                                                                                 | DIPS Rating |
|---------------------|-----------------|------------------------|------------------------------------------------------------------------------------------|------------------------------------------------------------------------------------|-----------------------------------------------------------|--------------------------------------------------------------------------------------------|-------------|
| <b>Atorvastatin</b> |                 |                        |                                                                                          |                                                                                    |                                                           |                                                                                            |             |
| 45 M [35]           | 1.5 mg/day      | Atorvastatin 10 mg/day | 2 weeks after atorvastatin started, muscle weakness, myalgia, fatigue, altered mentation | CK 9,035 U/L, SCr 8.1 mg/dL, dark urine, Myoglobin >3000 ng/mL; Dx: rhabdomyolysis | Nephrotic syndrome                                        | Colchicine & atorvastatin stopped with some improvement but died of septic shock on day 18 | Probable    |
| 43 M [36]           | 1.5 mg/day      | Atorvastatin 10 mg/day | 2 weeks after atorvastatin started, muscle weakness, myalgia                             | CK 608 U/L, SCr 1.4 mg/dL, estimated GFR 71.5 mL/min; EMG: myopathy                | Renal amyloidosis with modest reduction in renal function | Colchicine & atorvastatin stopped; resolution over 2 weeks                                 | Probable    |



| Patient, Ref.      | Colchicine Dose | Statin Dose            | Onset, Presenting Symptoms                                                                                                                                       | Laboratory and Other Findings                                                                                                                            | Risk Factors                                                                                                                                | Resolution                                                                                                                           | DIPS Rating                            |
|--------------------|-----------------|------------------------|------------------------------------------------------------------------------------------------------------------------------------------------------------------|----------------------------------------------------------------------------------------------------------------------------------------------------------|---------------------------------------------------------------------------------------------------------------------------------------------|--------------------------------------------------------------------------------------------------------------------------------------|----------------------------------------|
| 41 M [36]          | 1.0 mg/day      | Atorvastatin 20 mg/day | 20 days after atorvastatin started, muscle weakness, myalgia, dyspnea                                                                                            | CK 11,069 U/L, SCr 1.39 mg/dL, estimated GFR 74.5 mL/min, proteinuria 4g/day; EMG: myopathy                                                              | Renal amyloidosis with modest reduction in renal function                                                                                   | Colchicine & atorvastatin stopped; symptoms resolved in 1 week, labs resolved over 2 weeks                                           | Probable                               |
| 47 M [37]          | 1.0 mg/day      | Atorvastatin 20 mg/day | 2 months after starting colchicine admitted with progressive muscle weakness becoming severe                                                                     | CK 25,237 U/L, AST 225 U/L, SCr 6.2; Dx: rhabdomyolysis                                                                                                  | On cyclosporine (likely more responsible than atorvastatin for the myopathy); Chronic corticoids; Renal transplant                          | Atorvastatin stopped but CK continued to rise; then colchicine stopped and CK normalized within 3 weeks                              | Doubtful (Probable for CYC, see above) |
| 66 F [38]          | 0.6 mg/day      | Atorvastatin 80 mg/day | On chronic colchicine and atorvastatin; 3 weeks after sofosbuvir + ledipasvir started nausea, vomiting, diarrhea, abdominal pain; 1 week later myalgia, weakness | CK 7,979 U/L, AST 362 U/L, SCr 2.5 mg/dL estimated GFR 23 mL/min; EMG: myopathy; Dx: rhabdomyolysis                                                      | Chronic kidney disease, liver cirrhosis; Ledipasvir is a P-gp inhibitor which may have increased levels of both colchicine and atorvastatin | Atorvastatin stopped, gradual improvement; muscle weakness persisted for months                                                      | Possible                               |
| 55 M [39]          | Not stated      | Atorvastatin dose NS   | 1 week after starting atorvastatin, severe, muscle weakness                                                                                                      | CK 222,166 U/L; Dx: rhabdomyolysis                                                                                                                       | None stated                                                                                                                                 | Colchicine & atorvastatin stopped with gradual resolution; colchicine later restarted without incident                               | Possible                               |
| 41 M [40]          | 2 mg/day        | Atorvastatin 10 mg/day | On chronic atorvastatin; 6 months after colchicine started developed rhabdomyolysis                                                                              | CK 13,192 U/L, SCr 19 mg/dL                                                                                                                              | Large colchicine dose given; reduced renal function (renal amyloidosis); renal function gradually declined before rhabdomyolysis            | Colchicine & atorvastatin stopped; patient started chronic hemodialysis and was not re-started on colchicine.                        | Possible                               |
| 70 F [41]          | 0.6 mg/day      | Atorvastatin 20 mg/day | 6 days after starting colchicine and daptomycin developed increasing muscle weakness and myalgia                                                                 | CK 4,860, SCr 1.04 mg/dL, eGFR 49 mL/min, AST 310, ALT 98                                                                                                | Daptomycin can cause myopathy; it was restarted without colchicine or                                                                       | Colchicine, daptomycin and atorvastatin were stopped; 1 week later symptoms resolved and labs normal                                 | Possible <sup>a</sup>                  |
| 94 M [42]          | 0.5 mg/day      | Atorvastatin 40 mg/day | On chronic atorvastatin; one month after colchicine started presented with tetraparesis and inability to walk                                                    | CK 1,563 U/L, SCr 1.6 mg/dL. Negative for autoimmune diseases and Ab anti HMG-CoA; EMG: myopathy; Muscle biopsy: sarcoplasmic vacuoles, no necrosis      | Chronic kidney disease (baseline SCr 1.2 mg/dL)                                                                                             | Colchicine & atorvastatin stopped; CK normal after 5 days. SCr normalized in 1 week (1.23mg/dL). Residual leg weakness of for months | Probable                               |
| <b>Fluvastatin</b> |                 |                        |                                                                                                                                                                  |                                                                                                                                                          |                                                                                                                                             |                                                                                                                                      |                                        |
| 70 M [43]          | 1.5 mg/day      | Fluvastatin 80 mg/day  | 3 days after starting colchicine nausea, abdominal pain; 10 days after starting colchicine he had muscle weakness, severe myalgia, and rhabdomyolysis            | CK 37,782 U/L; myoglobin in urine; myoglobinuric acute renal failure; one month prior to colchicine his SCr was 0.9 mg/dL and urea nitrogen was 38 mg/dL | None stated.                                                                                                                                | Colchicine and fluvastatin stopped; gradual improvement over 2-3 weeks                                                               | Possible                               |
| 77 M [44]          | 1.0 mg/day      | Fluvastatin 80 mg/day  | 14 days after starting colchicine nausea and abdominal pain, followed later by severe myalgia and muscle weakness                                                | CK 2371 U/L, Myoglobin > 3000 ng/mL, SCr 1.74 mg/dL, estimated CrCl 41 mL/min; EMG: myopathy                                                             | Chronic renal failure; taking unspecified calcium channel blocker <sup>b</sup>                                                              | Colchicine and fluvastatin stopped; gradual improvement over 16 days                                                                 | Possible                               |



| <b>Lovastatin</b>   |                                            |                                       |                                                                                                                                                         |                                                                                                                                         |                                                                                                      |                                                                                                                    |                       |
|---------------------|--------------------------------------------|---------------------------------------|---------------------------------------------------------------------------------------------------------------------------------------------------------|-----------------------------------------------------------------------------------------------------------------------------------------|------------------------------------------------------------------------------------------------------|--------------------------------------------------------------------------------------------------------------------|-----------------------|
| 74 M [45]           | Not stated                                 | Lovastatin (Dose NS)                  | About 14 days after starting lovastatin developed severe muscle weakness                                                                                | CK 8370 U/L; EMG: myopathy                                                                                                              | None observed; patient had normal renal function and was not on other medications                    | Colchicine and lovastatin were stopped; gradual improvement over weeks                                             | Possible <sup>b</sup> |
| Patient, Ref.       | Colchicine Dose                            | Statin Dose                           | Onset, Presenting Symptoms                                                                                                                              | Laboratory and Other Findings                                                                                                           | Risk Factors                                                                                         | Resolution                                                                                                         | DIPS Rating           |
| <b>Pravastatin</b>  |                                            |                                       |                                                                                                                                                         |                                                                                                                                         |                                                                                                      |                                                                                                                    |                       |
| 65 F [46]           | 1.5 mg/day                                 | Pravastatin 20 mg/day                 | 20 days after starting pravastatin: muscle weakness                                                                                                     | CK 914 U/L; EMG: myopathy                                                                                                               | None stated.                                                                                         | Colchicine and pravastatin were stopped; gradual improvement over 7 days <sup>c</sup>                              | Possible <sup>d</sup> |
| 34 M [25]           | Variable <sup>e</sup>                      | Pravastatin 20 mg/day                 | 12 days after colchicine started: "muscle symptoms"                                                                                                     | CK 3206 U/L, rhabdomyolysis with renal failure                                                                                          | Patient also on cyclosporine and azithromycin; both can increase colchicine AUC                      | Colchicine DCd; 11 days later improved muscular and respiratory Sx; renal function stabilized                      | Doubtful <sup>f</sup> |
| <b>Rosuvastatin</b> |                                            |                                       |                                                                                                                                                         |                                                                                                                                         |                                                                                                      |                                                                                                                    |                       |
| 68 M [47]           | 0.5 mg/day                                 | Rosuvastatin (Dose NS)                | 14 days after starting colchicine: muscle weakness (difficulty with gait and rising from a chair)                                                       | CK 2,200 U/L; EMG: myopathy; Muscle biopsy: vacuolar myopathy (suggesting colchicine effect)                                            | Genotyping of P-gp showed much lower P-gp activity compared to 4 controls                            | Colchicine & rosuvastatin stopped; CK normal in 1 week; gradual symptom improvement                                | Probable              |
| 72 M [47]           | Not stated                                 | Rosuvastatin (Dose NS)                | Had 3 rhabdomyolysis episodes of a 2-year period with weakness, myalgia, and reduced mobility                                                           | CK on 3 episodes: 4,021, 4,568 and 3212; Muscle biopsy: vacuolar myopathy (suggesting colchicine effect)                                | Genotyping of P-gp showed marginally lower P-gp activity compared to 4 controls                      |                                                                                                                    | Possible <sup>g</sup> |
| 49 M [48]           | 1.0 mg/day                                 | Rosuvastatin 40 mg/day                | On colchicine for 1 month; 10 days after starting rosuvastatin progressive muscle pain, severe muscle weakness; fatigue, dark urine; Dx: rhabdomyolysis | CK 21,000 U/L; SCr 5.2 mg/dL (2.5 mg/dL before rosuvastatin started); AST 645 U/L; ALT 689 U/L; LDH 930 U/L;                            | Chronic renal insufficiency (stage III); on amlodipine (weak CYP3A4/Pgp inhibitor);                  | Colchicine & rosuvastatin stopped; in 1 week SCr returned to baseline; muscle-related enzymes gradually normalized | Probable              |
| <b>Simvastatin</b>  |                                            |                                       |                                                                                                                                                         |                                                                                                                                         |                                                                                                      |                                                                                                                    |                       |
| 70 M [49]           | 1.0 mg/day                                 | Simvastatin (Dose NS)                 | 14 days after starting colchicine, severe muscle weakness, no myalgia                                                                                   | CK 918 U/L, SCr 3.0 mg/dL                                                                                                               | Chronic renal insufficiency                                                                          | Colchicine & simvastatin stopped; resolution over 2 weeks                                                          | Probable              |
| 79 M [50]           | 0.6 mg/day x 4 days; 1.2 mg/day for 4 days | Simvastatin 40 mg/day                 | 8 days after colchicine started, severe muscle weakness, dyspnea                                                                                        | CK 50,936 U/L (peak), SCr went from 4.3 to 6.5 mg/dL due to myoglobinuria; EMG: myopathy; Muscle biopsy: vacuolar myopathy (colchicine) | Chronic renal insufficiency                                                                          | Colchicine stopped; resolution over 2 weeks                                                                        | Probable              |
| 61 F [51]           | 1.2 mg/day                                 | Simvastatin 80 mg/day                 | Muscle weakness 12 days after colchicine began, became severe over next 9 days, no myalgia                                                              | CK 6765 U/L, SCr 1.7 mg/dL; myoglobinuria                                                                                               | Simvastatin dose increased from 40 mg/day to 80 mg/day 1 week before myopathy; mild renal impairment | Colchicine & simvastatin DCd; resolved in 2 weeks; later simvastatin 80/day restarted w/ no myopathy               | Possible              |
| 30 M [36]           | 1.5 mg/day                                 | Simvastatin 20 mg/day                 | 3 weeks after simvastatin started, developed muscle weakness, myalgia, cramps                                                                           | CK 1232 U/L, SCr 1.28 mg/dL, estimated GFR 76.4 mL/min                                                                                  | Renal amyloidosis with modest renal impairment                                                       | Colchicine & simvastatin DCd; resolved in 2 weeks                                                                  | Probable              |
| 66 M [24]           | 1.2 mg/day                                 | Simvastatin 30 mg/day, then 60 mg/day | Increasing muscle weakness over 4 months after simvastatin dose increased from 30 to 60 mg/day;                                                         | CK 33,580 U/L                                                                                                                           | On cyclosporine and propofol, both of which may have contributed to myopathy; chronic corticoids     | Colchicine & simvastatin were stopped, but he developed pneumonia and                                              | Possible              |

|           |                                      |                       |                                                                                                                                                           |                                                                                                                                           |                                                                                                                                   |                                                                                                                              |                       |
|-----------|--------------------------------------|-----------------------|-----------------------------------------------------------------------------------------------------------------------------------------------------------|-------------------------------------------------------------------------------------------------------------------------------------------|-----------------------------------------------------------------------------------------------------------------------------------|------------------------------------------------------------------------------------------------------------------------------|-----------------------|
|           |                                      |                       | On admission severe muscle weakness, myalgia, dyspnea                                                                                                     |                                                                                                                                           |                                                                                                                                   | septic shock and died 5 days later                                                                                           |                       |
| 84 M [52] | 1.0 mg/day x 3 days, then 0.5 mg/day | Simvastatin 40 mg/day | Over 3 weeks after starting colchicine, increased muscle weakness, myalgia, dysphagia                                                                     | CK 2837 U/L, baseline eGFR: 37mL/min decreasing to 23mL/min during reaction; no myoglobinuria                                             | Renal impairment; on amlodipine (modest inhibitor of P-gp); chronic corticoids                                                    | Colchicine & simvastatin stopped; resolution of CK by 3 weeks, and muscle weakness over 8 weeks                              | Possible              |
| 60 M [29] | 1.5 mg/day x 6 weeks                 | Simvastatin (Dose NS) | 3 weeks after starting colchicine: diarrhea, anorexia, muscle weakness causing falls                                                                      | CK 1,912 U/L, SCr 5.9 mg/dL (had been about 2.6 mg/dL); EMG: acute myopathy; Muscle biopsy did not show vacuoles typical of colchicine    | Stage 4 chronic kidney disease, colchicine dose too high for degree of renal impairment; On amlodipine (modest inhibitor of P-gp) | Colchicine, simvastatin, amlodipine stopped; still anuric, but improved after 3 hemodialysis sessions; resolved over 3 weeks | Possible              |
| 70 M [53] | 0.5 to 1.0 mg/day                    | Simvastatin 40 mg/day | On simvastatin x 6 years, started on colchicine; later (time NS) progressive muscle weakness, severe myalgia; difficulty walking/climbing stairs; dyspnea | CK More than 100 times upper limit of normal; Myoglobin 21,896 µg/L; SCr 7.7 mg/dL; Muscle biopsy consistent with statin-induced myopathy | Renal impairment                                                                                                                  | Simvastatin stopped; hemofiltration started; normalization of renal function by 3 days, CK by 15 days                        | Possible              |
| 64 M [54] | 1.2 mg/day                           | Simvastatin 80 mg/day | On chronic simvastatin and colchicine when clarithromycin started; after 3 weeks admitted with muscle pain, muscle weakness, and dark urine               | CK 213,978 U/L (peak); SCr 8.0 mg/dL (baseline 4.8 mg/dL); AST 981 U/L; ALT 301 U/L;                                                      | On clarithromycin (1000 mg/day which increases AUC of both colchicine and simvastatin; severe renal impairment                    | Simvastatin, colchicine and clarithromycin DCd, but he developed cardiac & respiratory arrest and later died on day 117      | Doubtful <sup>b</sup> |

- a.
- b. If the calcium-channel blocker was diltiazem or verapamil, either one could have elevated colchicine serum concentrations.
- c. Drug doses were not given, so it is difficult to evaluate the case. Also, one cannot rule out the possibility that the myopathy was due to lovastatin alone. Nonetheless, it is possible that there was additive myotoxicity of lovastatin and colchicine.
- c. The colchicine was subsequently re-started at a lower dose of 1 mg/day without incident.
- d. One cannot rule out that the myopathy was due to colchicine alone although she did not have renal impairment and colchicine-induced myopathy at that dose of colchicine would be unusual.
- e. Twelve days before admission he took 3 mg/d x 1 day, 2 mg/d x 2 days, then 1 mg/day x 6 days.
- f. The myotoxicity was much more likely to be due to the cyclosporine and azithromycin the patient was taking, both of which have been shown to increase colchicine serum concentrations. Also, cyclosporine increases pravastatin serum concentrations, [Yee, SW et al. Organic anion transporter polypeptide 1B1 polymorphism modulates the extent of drug-drug interaction and associated biomarker levels in healthy volunteers. *Clin. Transl. Sci.* 12, 388-399 (2019)] which would increase the risk of pravastatin myopathy.
- g. One of the 3 episodes of rhabdomyolysis occurred with colchicine alone, so the role of a drug interaction was not clear. One retrospective study compared the risk of myopathy in patients receiving statins with or without concurrent colchicine, 28 patients took rosuvastatin with colchicine. [Kwon 2017] Two of the patients on rosuvastatin and colchicine developed myopathy (both took 1.2 mg/day colchicine) but too little information was provided to assess causality.
- h. The patient was on chronic colchicine and high-dose simvastatin without muscle symptoms, so this reaction is unlikely to be due to a DDI between simvastatin and colchicine. Rhabdomyolysis only occurred after clarithromycin was started. The ability of clarithromycin to increase the serum concentrations of both colchicine and simvastatin was the likely cause.

**Macrolides: Clarithromycin** (Two case below. Our group previously published a table describing the other 20 cases. See table in Villa-Zapata,<sup>48</sup> and references 49-60 below. The Australian Adverse Drug Reactions Advisory Committee reported four cases of severe colchicine toxicity due to clarithromycin, three of which were fatal. Not enough detail was given to evaluate causality. (Topliss 2008)<sup>61</sup>

| Patient, Ref. | Colchicine Dose | Clarithromycin Dose | Onset, Presenting Symptoms                                                                             | Laboratory and Other Findings                                                                                                        | Risk Factors                                                                   | Resolution                                                                    | DIPS Rating |
|---------------|-----------------|---------------------|--------------------------------------------------------------------------------------------------------|--------------------------------------------------------------------------------------------------------------------------------------|--------------------------------------------------------------------------------|-------------------------------------------------------------------------------|-------------|
| 85 F [62]     | 2 mg/day        | 1 g/day x 14 days   | On clarithromycin for <i>H. pylori</i> ; 4 days after adding colchicine platelet count reduced to half | Estimated GFR 28 mL/min; Platelet count: before colchicine 230 10 <sup>9</sup> /L; 4 days after colchicine 127x10 <sup>9</sup> /L; 6 | Clearly excessive dose of colchicine given marked impairment of renal function | 6 days after colchicine added to clarithromycin, she died of a cardiac arrest | Probable    |

|                  |            |                     |                                                                                                                                             |                                                                                          |                                                              |                                                                                                                         |                       |
|------------------|------------|---------------------|---------------------------------------------------------------------------------------------------------------------------------------------|------------------------------------------------------------------------------------------|--------------------------------------------------------------|-------------------------------------------------------------------------------------------------------------------------|-----------------------|
|                  |            |                     |                                                                                                                                             | days after colchicine 32x10 <sup>9</sup> /L, and white cell count 0.8x10 <sup>9</sup> /L |                                                              |                                                                                                                         |                       |
| 64 M [54]<br>Lee | 1.2 mg/day | 1 g/day for 21 days | On chronic simvastatin and colchicine when clarithromycin started; after 3 weeks admitted with muscle pain, muscle weakness, and dark urine | CK 213,978 U/L (peak); SCr 8.0 mg/dL (baseline 4.8 mg/dL); AST 981 U/L; ALT 301 U/L;     | On high-dose simvastatin (80 mg/day) severe renal impairment | Simvastatin, colchicine and clarithromycin DCd, but he developed cardiac & respiratory arrest and later died on day 117 | Probable <sup>a</sup> |

a. The reaction was likely due to a triple drug interaction, with clarithromycin increasing the serum concentrations of both colchicine and simvastatin. Colchicine serum concentrations were probably high due to the clarithromycin and the severe renal impairment. The simvastatin serum concentrations were probably high due to the large dose (80 mg/day) and the clarithromycin.

## Macrolides: Erythromycin

| Patient, Ref. | Colchicine Dose | Erythromycin Dose | Onset, Presenting Symptoms                                                                                                         | Laboratory and Other Findings                                                                                                                        | Risk Factors                                 | Resolution                                                                                                                                                                   | DIPS Rating |
|---------------|-----------------|-------------------|------------------------------------------------------------------------------------------------------------------------------------|------------------------------------------------------------------------------------------------------------------------------------------------------|----------------------------------------------|------------------------------------------------------------------------------------------------------------------------------------------------------------------------------|-------------|
| 29 F [63]     | 1 mg/day        | 2 g/day x 14 days | 16 days after starting erythromycin admitted with diarrhea, vomiting, abdominal pain, dyspnea, fever, severe myalgia, paresthesias | SCr 10.4 mg/dL, liver enzymes markedly elevated; pancytopenia, serum colchicine about 10 times higher than upper end of reference range <sup>a</sup> | Renal and liver amyloidosis, on hemodialysis | Colchicine stopped, extra hemodialysis given, patient later developed seizures, <sup>b</sup> alopecia, hypoglycemia, bizarre behavior; hospitalized for 70 days <sup>c</sup> | Probable    |

a. Serum colchicine on admission was 22 ng/mL (reference range of 1-2.5 ng/mL). Colchicine levels 1 and 5 months before the current admission (when renal function was about the same) were 9.0 and 12.6 mg/dL respectively. This suggests that in patients on chronic hemodialysis, colchicine 1 mg/day may be excessive. The colchicine levels 1 and 5 months earlier also support the role of erythromycin as the precipitating cause of the colchicine toxicity, since the colchicine serum concentrations approximately doubled after two weeks on clarithromycin.

b. The seizures were treated with a phenobarbital drip, which inadvertently may have helped the patient eliminate the colchicine by inducing the CYP3A4 enzyme.

c. Despite “intensive hemodialysis” the colchicine toxicity was prolonged; one month after the last dose of colchicine the serum concentration was still 0.23 ng/dL. This demonstrates how difficult it is to treat colchicine toxicity in patients with severe renal impairment, since colchicine is not removed by hemodialysis. Her impaired liver function may have contributed as well.

## Quinolines: Hydroxychloroquine

| Patient, Ref. | Colchicine Dose | Quinoline Dose                | Onset, Presenting Symptoms                                                                           | Laboratory and Other Findings                                                                                                                                         | Risk Factors                                           | Resolution                                                                   | DIPS Rating           |
|---------------|-----------------|-------------------------------|------------------------------------------------------------------------------------------------------|-----------------------------------------------------------------------------------------------------------------------------------------------------------------------|--------------------------------------------------------|------------------------------------------------------------------------------|-----------------------|
| 66 F [64]     | Not stated      | Hydroxychloroquine 400 mg/day | 4+ weeks after colchicine added, admitted with severe muscle weakness; not able to stand; no myalgia | CK 343 U/L; Normal: CBC, liver function tests, electrolytes, and urine analysis; Electron microscopy suggested myopathy due to both hydroxychloroquine and colchicine | She had mild muscle weakness before colchicine started | Both hydroxychloroquine and colchicine stopped; symptoms resolved by 8 weeks | Possible <sup>a</sup> |

a. The colchicine dose was not stated, so it is not possible to rule out an excessive dose of colchicine as the cause of the myopathy.

## Miscellaneous Drugs

| Patient, Ref.     | Colchicine Dose | Drug and Dose         | Onset, Presenting Symptoms                                                                                 | Laboratory and Other Findings                  | Risk Factors | Resolution                                                                  | DIPS Rating           |
|-------------------|-----------------|-----------------------|------------------------------------------------------------------------------------------------------------|------------------------------------------------|--------------|-----------------------------------------------------------------------------|-----------------------|
| <b>Disulfiram</b> |                 |                       |                                                                                                            |                                                |              |                                                                             |                       |
| 44 M [65]         | 1 mg/day        | Disulfiram 200 mg/day | 12 hours after first dose of disulfiram, severe erythematous skin reaction, leukopenia, fever, tachycardia | Leukocyte count 3800/mcL, Hemoglobin 10.6 g/dL | None stated  | Disulfiram stopped with continued colchicine; reaction resolved over 2 days | Doubtful <sup>a</sup> |

| <b>Fibrates</b>  |                                                          |                                 |                                                                                                                                |                                                                                                                                                                          |                                                                                                 |                                                                                                                                       |                       |
|------------------|----------------------------------------------------------|---------------------------------|--------------------------------------------------------------------------------------------------------------------------------|--------------------------------------------------------------------------------------------------------------------------------------------------------------------------|-------------------------------------------------------------------------------------------------|---------------------------------------------------------------------------------------------------------------------------------------|-----------------------|
| 40 M [66]        | 1.5 mg/day                                               | Gemfibrozil 1200 mg/day         | On chronic colchicine, started on gemfibrozil; weeks later developed muscle pain, dark brown urine, fatigue, and anorexia      | CK 3559 U/L, SCr 2.6 mg/dL, elevated LFT (ALT, AST, LD), Urine protein 5 g/day                                                                                           | Chronic hepatic and renal disease; Excessive colchicine dose given hepatic and renal impairment | All drugs discontinued; clinical and laboratory improvement by day 4; recovery by day 9; colchicine 1 mg/day started with no myopathy | Possible <sup>b</sup> |
| 75 M [67]        | Not stated                                               | Bezafibrate 400 mg/day          | 14 days after colchicine started: severe diarrhea, tetraparesis and numbness of all 4 limbs                                    | Elevated muscle enzymes; EMG: suggested neuromyopathy                                                                                                                    | Chronic renal failure                                                                           | Bezafibrate & colchicine DCd and Sx resolved rapidly                                                                                  | Possible <sup>c</sup> |
| <b>Nivolumab</b> |                                                          |                                 |                                                                                                                                |                                                                                                                                                                          |                                                                                                 |                                                                                                                                       |                       |
| 70 M [68]        | 1.8 mg/day 3 courses                                     | Nivolumab 3 mg/kg every 2 weeks | None stated. Patient did not develop nausea, vomiting or diarrhea                                                              | After 8 weeks of colchicine platelet count decreased from 160,000/mm <sup>3</sup> to 125,000, and to 115,000 by 12 weeks; absolute neutrophil count 2200/mm <sup>3</sup> | None described (renal and liver function tests all normal)                                      | Colchicine stopped; thrombocytopenia resolved in about 1 month; neutrophils increased to 3200/mm <sup>3</sup>                         | Possible              |
| <b>Sunitinib</b> |                                                          |                                 |                                                                                                                                |                                                                                                                                                                          |                                                                                                 |                                                                                                                                       |                       |
| 82 M [69]        | 4.8 mg/day x 7 days; 3.6 mg/day x 2 days; 0.6 mg x 1 day | Sunitinib 50 mg/day             | Started sunitinib on day 7 of colchicine, on day 8 severe diarrhea, on day 10 admitted with shortness of breath and chest pain | Day 2 of admission fever, metabolic acidosis, hypokalemia, heart failure, thrombocytopenia, white cell abnormalities, anemia                                             | Excessive dose of colchicine, particularly given renal impairment; patient also on diltiazem    | Not discussed. (assume patient survived)                                                                                              | Doubtful <sup>d</sup> |

- a. Although the authors attributed the reaction to colchicine toxicity caused by disulfiram, it is unlikely that a single dose of a questionable P-gp inhibitor such as disulfiram would interact with colchicine, especially that quickly.
- b. The relative roles of gemfibrozil and colchicine—alone or together—in the etiology of the rhabdomyolysis is not clear. Several factors should be considered: 1) The patient had modest impairment of renal function before the gemfibrozil, so the original dose of colchicine may have been excessive. 2) The addition of the gemfibrozil may have caused the rhabdomyolysis by itself, with no contribution from the colchicine. 3) Gemfibrozil-induced rhabdomyolysis may have reduced renal function from baseline resulting in elevated colchicine serum concentrations and worsening of the myotoxicity. 4) Perhaps the colchicine and gemfibrozil had an intrinsic additive effect in producing the myopathy.
- c. Article was in Japanese, and not enough information was given in the English abstract for detailed assessment of causality.
- d. The most likely cause of the colchicine toxicity was the clearly excessive dose of colchicine in the presence of renal impairment, and the diltiazem therapy, a drug known to increase colchicine serum concentrations. It is possible that sunitinib contributed to the colchicine toxicity by inhibiting P-gp, but this is speculative.

## References

1. Zagler, B. et al. Patient risk factors and adverse drug interactions in the treatment of gouty arthritis in the elderly: a case report. *Cases J.* **2**, 6602 (2009).
2. Ben Salem C, Sakhri J, Fathallah N, Trimech B, Hmouda H, Kamel B. Colchicine-induced rhabdomyolysis and possible amiodarone interaction. *Pharmacol. & Pharmacy.* **1**, 39-41 (2010).
3. Mullins, M., Cannarozzi, A.A., Bailey, T.C. & Ranganathan P. Unrecognized fatalities related to colchicine in hospitalized patients. *Clin. Toxicol.* **49**, 648-652 (2011).
4. Su, Y-C. & Wu, C-C. Colchicine-induced acute neuromyopathy in a patient using concomitant fluconazole: case report and literature review. *Drug Saf. Case Rep.* **2**, 16 (2015).
5. Grezard, O., Lebranchu, Y., Birmele, B., Sharobeem, R., Nivet, H. & Bagros P. Cyclosporin-induced muscular toxicity. *Lancet* **335**, 177 (1990).
6. Rieger, E.H., Halasz, N.A., Wahlstrom, H.E. Colchicine neuromyopathy after renal transplantation. *Transplantation* **49**, 1196-1198 (1990).
7. Jonsson, J., Gelpi, J.R., Light, J.A., Aquino, A., Maszaros, S. Colchicine-induced myoneuropathy in a renal transplant patient. *Transplantation* **53**, 1369-1371 (1992).
8. Cook, M., Ramos, E., Peterson, J. & Croker B. Colchicine neuromyopathy in a renal transplant patient with normal muscle enzyme levels. *Clin. Nephrol.* **42**, 67-68 (1994).
9. Yussim, A. et al. Gastrointestinal, hepatorenal, and neuromuscular toxicity caused by cyclosporine-colchicine interaction in renal transplantation. *Transplant. Proc.* **26**, 2825-2826 (1994).
10. Montseny, J.J., Meyrier, A., Gherardi, R.K. Colchicine toxicity in patients with chronic renal failure. *Nephrol. Dial. Transplant.* **11**, 2055-2058 (1996).
11. Rutkove, S.B. et al. Myotonia in colchicine myoneuropathy. *Muscle Nerve* **19**, 870-875 (1996).
12. Tapal, M.F. Colchicine myopathy. *Scand. J. Rheumatol.* **25**, 105-106 (1996).
13. Jagose, J.T., Bailey, R.B. Muscle weakness due to colchicine in a renal transplant recipient. *N. Z. Med. J.* **110**, 343 (1997).
14. Ducloux, D., Schuller, V., Bresson-Vautrin, C. & Chalopin, J.M. Colchicine myopathy in renal transplant recipients on cyclosporin. *Nephrol. Dial. Transplant.* **12**, 2389-2392 (1997).
15. Lee, B.I., Shin, S.J., Yoon, S.N., Choi, Y.J., Yang, C.W. & Bang, B.K. Acute myopathy induced by colchicine in a cyclosporine-treated renal transplant recipient: a case report and review of the literature. *J. Korean Med. Sci.* **12**, 160-161 (1997).
16. Rana, S.S., Giuliani, M.J., Oddis, C.V. & Lacomis D. Acute onset of colchicine myoneuropathy in cardiac transplant recipients: case studies of three patients. *Clin. Neurol. Neurosurg.* **99**, 266-270 (1997).

17. Gruberg, L., Har-Zahav, Y., Agranat, O. & Freimark, D. Acute myopathy induced by colchicine in a cyclosporine treated heart transplant recipient: possible role of the multidrug resistance transporter. *Transplant. Proc.* **31**, 2157-2158 (1999).
18. Shinde, A., Nakano, S., Abe, M., Kohara, N., Akiguchi, I. & Shibasaki H. Accumulation of microtubule-based motor protein in a patient with colchicine myopathy. *Neurology* **55**, 1414-1415 (2000).
19. Dupont, P., Hunt, I., Goldberg, L. & Warrens A. Colchicine myoneuropathy in a renal transplant patient. *Transpl. Int.* **15**, 374-376 (2002).
20. Caglar, K., Safali, M., Yavuz, I., Odabasi, Z., Yenicesu, M. & Vural A. Colchicine-induced myopathy with normal creatine phosphokinase level in a renal transplant patient. *Nephron* **92**, 922-924 (2002).
21. Minetti, E.E., Minetti, L. Multiple organ failure in a kidney transplant patient receiving both colchicine and cyclosporine. *J Nephrol.* **16**, 421-425 (2003).
22. Phanish, M.K., Krisnamurthy, S., Bloodworth, L.L.O. Colchicine-induced rhabdomyolysis. *Am. J. Med.* **114**, 166-167 (2003).
23. Eleftheriou, G., Bacis, G., Fiocchi, R. & Sebastiano, R. Colchicine-induced toxicity in a heart transplant patient with chronic renal failure. *Clin. Toxicol.* **46**, 827-830 (2008).
24. Francis, L. et al. Fatal toxic myopathy attributed to propofol, methylprednisolone, and cyclosporine after prior exposure to colchicine and simvastatin. *Clin. Rheumatol.* **27**, 129-131 (2008).
25. Bouquié, R., Deslandes, G., Renaud, C., Dailly, E., Haloun, A. & Jolliet, P. Colchicine-induced rhabdomyolysis in a heart/lung transplant patient with concurrent use of cyclosporine, pravastatin, and azithromycin. *J. Clin. Rheumatol.* **17**, 28-30 (2011).
26. Garrouste, C., Philipponnet, C., Kaysi, S., Enache, I., Tiple, A. & Heng. A.E. Severe colchicine intoxication in a renal transplant recipient on cyclosporine. *Transplant. Proc.* **44**, 2851-2852 (2012).
27. Huh, K. et al. Colchicine-induced myoneuropathy in a cyclosporine-treated transplant recipient. *Kidney Res. Clin. Pract.* **32**, 74-77 (2013).
28. Stromberg, P., Wills B.K. & Rutherford Rose, S. Gout exacerbation, weakness, hypotension—Dx? *J. Fam. Pract.* **63**, 455-456 (2014).
29. Medani, S. & Wall, C. Colchicine toxicity in renal patients—are we paying attention. *Clin Nephrol.* **86**, 100-105 (2016).
30. Yousuf Bhat, Z., Reddy, S., Pillai, U., Doshi, M. & Wilpula, E. Colchicine-induced myopathy in a tacrolimus-treated renal transplant recipient: case report and literature review. *Am. J. Ther.* **23**, e614-e616 (2016).
31. Tröger, U., Lins, H., Scherrmann, J-M., Wallesch, C-W., Bode-Böger, S.M. Tetraparesis associated with colchicine is probably due to inhibition by verapamil of the P-glycoprotein efflux pump in the blood-brain barrier. *BMJ.* **331**, 613 (2005).

32. Kazmi H, Cauchi M. Sub-therapeutic colchicine levels in a patient treated for pericarditis in the setting of carbamazepine use: a case report. *J Clin Pharm Ther.* 2021;00:1-3. <https://doi.org/10.1111/jcpt.13549>
33. Koo HS, Kim S, Chin HJ. A case of high dose colchicine with no efficacy in a patient with chronic kidney disease taking rifampicin. *J Rheum Dis.* **21** 314-316 (2014). <http://dx.doi.org/10.4078/jrd.2014.21.6.314>
34. Goldbart, A., Press, J.P., Sofer, S. & Kapelushnik, J. Near fatal acute colchicine intoxication in a child: a case report. *Eur. J. Pediatr.* **159**, 895-897 (2000).
35. Tufan, A., Dede, D.S., Cavus, S., Altintas, N.D., Iskit, A.B. & Topeli A. Rhabdomyolysis in a patient treated with colchicine and atorvastatin. *Ann. Pharmacother.* **40**, 1466-1469 (2006).
36. Sahin, G., Korkmaz, C. & Yalcin, A.U. Which statin should be used together with colchicine? Clinical experience in three patients with nephritic syndrome due to AA type amyloidosis. *Rheumatol. Int.* **28**, 289-291 (2008).
37. Phanish MK, Krishnamurthy S, Bloodworth LLO. Colchicine-induced rhabdomyolysis. *Am J Med.* 2003;114(2):166-67. [https://doi.org/10.1016/S0002-9343\(02\)01426-2](https://doi.org/10.1016/S0002-9343(02)01426-2)
38. Patel, S., Andres, A. & Qureshi, K. An unexpected interaction between sofosbuvir/ledipasvir and atorvastatin and colchicine causing rhabdomyolysis in a patient with impaired renal function. *Case Rep. Med.* **2016**, 3191089 (2016).
39. Auriemma, M.J. & Bunning, R.D. Poster 97. Statin-induced rhabdomyolysis triggered by concomitant colchicine administration: a case report. *PM R.* **8(9S)**, S193 (2016).
40. Cigni, A., Ledda, F. & Satta, AE. A complex case of renal amyloidosis with a rare co-occurrence of 2 mutations in separate hereditary periodic fever syndrome-related genes. *J. Nephrol.* **19**, 543-549 (2006).
41. Erlandson KM, Castillo-Mancilla J. The increasing complexity of elderly prescribing. Myotoxicity with the combination of daptomycin, atorvastatin, and colchicine. *Infect Dis Clin Pract.* **18**, 399-401 (2010)
42. Sánchez-Tejerina D, Ostos F, Toldos-González O, Gonzalo-Martinez JF, Herrero-San Martin A. Toxic myopathy associated with concomitant treatment with atorvastatin and colchicine. *Rev Neurol.* **68**, 488-89 (2019).
43. Atasoyu, E.M., Evrenkaya, T.R. & Solmazgul, E. Possible colchicine rhabdomyolysis in a fluvastatin-treated patient. *Ann. Pharmacother.* **39**, 1368-1369 (2005).
44. Sarullo, F.M., Americo, L., Di Franco, A. & Di Pasquale, P. Rhabdomyolysis induced by co-administration of fluvastatin and colchicine. *Monaldi Arch. Chest. Dis.* **74**, 147-149 (2010).
45. Torgovnick, J., Sethi, N., Arsura, E. Colchicine and HMG Co-A reductase inhibitors induced myopathy—a case report. *Neurotoxicology* **27**, 1126-1127 (2006).
46. Alayli, G., Cengiz, K., Cantürk, F., Durmus, D., Akyol, Y. & Menekse, E.B. Acute myopathy in a patient with concomitant use of pravastatin and colchicine. *Ann. Pharmacother.* **39**, 1358-1361 (2005).



47. Gupta, M., et al. Colchicine myopathy: a case series including muscle MRI and ABCB1 polymorphism data. *Front. Neurol.* **10**, 553 (2019).
48. Sabanis N, Paschou E, Drylli A, Papanikolaou P, Zagkotsis G. Rosuvastatin and colchicine combined myotoxicity: lessons to be learnt. *CEN Case Rep.* 2021 Nov;10(4):570-575. <https://doi.org/10.1007/s13730-021-00598-7>
49. Hsu, W-C., Chen, W-H., Chang, M-T. & Chiu, H-C. Colchicine-induced acute myopathy in a patient with concomitant use of simvastatin. *Clin. Neuropharmacol.* **25**, 266-268 (2002).
50. Baker, S.K., Goodwin, S., Sur, M. & Tarnopolsky, M.A. Cytoskeletal myotoxicity from simvastatin and colchicine. *Muscle Nerve* **30**, 799-802 (2004).
51. Justiniano, M., Dold, S. & Espinoza, L.R. Rapid onset of muscle weakness (rhabdomyolysis) associated with the combined use of simvastatin and colchicine. *J. Clin. Rheumatol.* **13**, 266-268 (2007).
52. Oh, D.H.J., Chan, S.Q. & Wilson, A.M. Myopathy and possible intestinal dysfunction in a patient treated with colchicine and simvastatin. *Med. J. Aust.* **197**, 332-333 (2012).
53. Frydrychowicz, C., Pasieka, B., Pierer, M., Muller, W., Petros, S. & Weidhase, L. Colchicine triggered severe rhabdomyolysis after long-term low-dose simvastatin therapy: a case report. *J. Med. Case Rep.* **11**, 8 (2017).
54. Lee AJ, Maddix DS. Rhabdomyolysis secondary to a drug interaction between simvastatin and clarithromycin. *Ann Pharmacother.* **35**, 26-31 (2001).
48. Villa Zapata, L. et al. Evidence of clinically meaningful drug–drug interaction with concomitant use of colchicine and clarithromycin. *Drug Saf* **43**, 661-668 (2020).
49. Cohen, O., Locketz, G., Hershko, A.Y., Gorshtein, A. & Levy, Y. Colchicine-clarithromycin-induced rhabdomyolysis in familial Mediterranean fever patients under treatment for *Helicobacter pylori*. *Rheumatol. Int.* **35**, 1937-1941 (2015).
50. Haj Yahia, S., Ben Zvi, I. & Livneh, A. Colchicine intoxication in familial Mediterranean fever patients using clarithromycin for the treatment of *Helicobacter pylori*: a series of six patients. *Rheumatol Int.* **38**, 141-147 (2018).
51. Dogukan, A., Oymak, F.S., Taskapan, H., Güven, M., Tokgoz, B. & Utas C. Acute fatal colchicine intoxication in a patient on continuous ambulatory peritoneal dialysis (CAPD). Possible role of clarithromycin administration. *Clin. Nephrol.* **55**, 181-182 (2001).
52. Rollot, F., Pajot, O., Chauvelot-Moachon, L., Nazal, E.M., Kélaïdi, C. & Blanche, P. Acute colchicine intoxication during clarithromycin administration. *Ann. Pharmacother.* **38**, 2074-2077 (2004).
53. Cheng, V.C., Ho, P.L. & Yuen, K.Y. Two probable cases of serious drug interaction between clarithromycin and colchicine. *South. Med. J.* **98**, 811-813 (2005).

54. Akdag, I., Ersoy, A., Kahvecioglu, S., Gullulu, M. & Dilek K. Acute colchicine intoxication during clarithromycin administration in patients with chronic renal failure. *J. Nephrol.* **19**, 515-517 (2006).
55. van der Velden, W., Huussen, J., Ter Laak, H. & de Sévaux, R. Colchicine-induced neuromyopathy in a patient with chronic renal failure: the role of clarithromycin. *Neth. J. Med.* **66**, 204-206 (2008).
56. McKinnell, J. & Tayek, J.A. Short term treatment with clarithromycin resulting in colchicine-induced rhabdomyolysis. *J. Clin. Rheumatol.* **15**, 303-305 (2009).
57. Izquierdo Pajuelo, M.J., Jiménez Delgado, J.D., Rangel Mayoral, J.F. & Liso Rubio, F.J. Fatal interaction between colchicine and clarithromycin. *Farm. Hosp.* **34**, 309-310 (2010).
58. Kim, J.B. et al. Colchicine-induced rhabdomyolysis caused by interaction with clarithromycin in a patient with Behçet disease. *J. Clin. Rheumatol.* **18**, 453-454 (2012).
59. Çelebi, Z.K., Akturk, S., Oktay, E.I., Duman, N. & Keven, K. Colchicine-induced rhabdomyolysis following concomitant use of clarithromycin in a hemodialysis patient with familial Mediterranean fever. *Clin. Kidney J.* **6**, 665-666 (2013).
60. Olmos-Martinez, J.M., Molina, H., Salas, C., Olmos, J.M., Hernández, J.L. Acute colchicine-induced neuromyopathy in a patient treated with atorvastatin and clarithromycin. *Eur. J. Case Rep. Intern. Med.* **6**, 001066 (2019).
61. Topoliss D, Gold M, Kotsirilos V, et al. Fatal interactions and reactions with colchicine. Beware CYP3A4 inhibitors. *Australian Adverse Drug Reactions Bulletin.* **27**, 18 (2008).
62. Ma, T.K., Chow, K.M., Choy, A.S., Kwan, B.C., Szeto, C.C. & Li, P.K. Clinical manifestation of macrolide antibiotic toxicity in CKD and dialysis patients. *Clin. Kidney J.* **7**, 507-512 (2014).
63. Caraco, Y., Putterman, C., Rahamimov, R. & Ben-Chetrit, E. Acute cyclosporine intoxication—possible role of erythromycin administration. *J. Rheumatol.* **19**, 494-496 (1992).
64. Lonesky, T.A., Kreuter, J.K., Wortmann, R.L., Rhodes, C.H. Hydroxychloroquine and colchicine induced myopathy. *J. Rheumatol.* **36**, 2617-2618 (2009).
65. Chen, S.C., Huang, M.C. & Fan, C.C. Potentially fatal interaction between colchicine and disulfiram. *Prog. Neuropsychopharmacol. Biol. Psychiatry.* **33**, 1281 (2009).
66. Atmaca, H., Sayarlioglu, H., Külah, E., Demircan, N. & Akpolat, T. Rhabdomyolysis associated with gemfibrozil-colchicine therapy. *Ann. Pharmacother.* **36**, 1719-1721 (2002).
67. Sugie, M., Kuriki, A., Arai, D., Ichikawa, H., Kawamura, M. A case report of acute neuromyopathy induced by concomitant use of colchicine and bezafibrate. *No To Shinkei.* **57**, 785-790 (2005).
68. Solomon, L.R. Thrombocytopenia due to low-dose colchicine therapy: a possible drug interaction with nivolumab and implications for supportive care. *Acta Oncol.* **54**, 1235-1237 (2015).

69. Abodunde, O.A., LavakaVeera, R.R., Desai, R., Nweke, N. & Berrou M. Colchicine toxicity precipitated by interaction with sunitinib. *J. Clin. Pharm. Ther.* **38**, 243-245 (2013).
